# Supplementary material for: Ammonia borane in an external electric field: structure, charge transfer, and chemical bonding
Source: Royal Society of Chemistry journal article supplement (doi:10.1039/c5ra10156e), 2015-01-01
Supplement: c5ra10156e1.pdf [file c5ra10156e1.pdf]

## Supporting Information

### **Ammonia Borane in External Electric Field: Structure, Charge transfer, and Chemical Bonding**

Xue Zhang, Shi-Ling Sun, Hong-Liang Xu\* and Zhong-Min Su\*

Institute of Functional Material Chemistry, Faculty of Chemistry, Northeast Normal University, Changchun

130024, Jilin, People's Republic of China

E-mail: [hlxu@nenu.edu.cn](mailto:hlxu@nenu.edu.cn), [zmsu@nenu.edu.cn](mailto:zmsu@nenu.edu.cn)

### General Comments

**Table S1.** The optimized structural parameters and dipole moment ( $\mu$ ) of  $\text{BH}_3\text{NH}_3$  in different external electric fields.

**Table S2.** NBO charge  $q_1$  of  $\text{BH}_3\text{NH}_3$  in external electric fields and NBO charge  $q_2$  of  $\text{BH}_3\text{NH}_3$  after external electric fields. The Laplacian of the electron density ( $\nabla^2\rho(r)$ ) and electron density ( $\rho$ ) of the bond critical points (BCPs).

**Table S3.** The fragment contribution to HOMO-2 of  $\text{BH}_3\text{NH}_3$  molecule in a series of  $E_{\text{ext}} \times 10^{-4}$  au.

**Table S4.** The optimized structural parameters of  $(\text{BH}_3\text{NH}_3)_2$  dimers in different external electric fields.

**Table S5.** Potential energy E of eclipsed forms of  $\text{BH}_3\text{NH}_3$  in different external electric fields.

**Table S1.** The optimized structural parameters and Dipole moment ( $\mu$ ) of  $\text{BH}_3\text{NH}_3$  in different external electric fields<sup>a</sup>.

| $E_{ext} \times 10^{-4}$ au | r (B-N) | r(B-H) | r(N-H) | H-B-H | H-N-H | H <sub>1</sub> -B-H <sub>2</sub> -H <sub>3</sub> | H <sub>1</sub> '-N-H <sub>2</sub> '-H <sub>3</sub> ' | $\mu_1$ | $\mu_2$ |
|-----------------------------|---------|--------|--------|-------|-------|--------------------------------------------------|------------------------------------------------------|---------|---------|
| -767                        | 1.653   | 1.263  | 1.045  | 106.7 | 101.0 | 113.9                                            | 103.7                                                | 13.33   | 6.30    |
| -750                        | 1.634   | 1.263  | 1.044  | 106.2 | 100.8 | 112.7                                            | 103.4                                                | 13.01   | 6.36    |
| -700                        | 1.617   | 1.258  | 1.040  | 106.1 | 101.1 | 112.7                                            | 103.7                                                | 12.26   | 6.35    |
| -650                        | 1.611   | 1.253  | 1.037  | 106.5 | 101.5 | 113.5                                            | 104.4                                                | 11.63   | 6.31    |
| -600                        | 1.608   | 1.247  | 1.034  | 107.1 | 102.0 | 114.6                                            | 105.2                                                | 11.04   | 6.25    |
| -550                        | 1.606   | 1.242  | 1.032  | 107.7 | 102.5 | 115.9                                            | 106.0                                                | 10.49   | 6.18    |
| -519                        | 1.606   | 1.239  | 1.031  | 108.1 | 102.8 | 116.8                                            | 106.5                                                | 10.15   | 6.14    |
| -500                        | 1.606   | 1.237  | 1.030  | 108.3 | 102.9 | 117.3                                            | 106.8                                                | 9.96    | 6.12    |
| -450                        | 1.607   | 1.233  | 1.028  | 108.9 | 103.4 | 118.7                                            | 107.6                                                | 9.46    | 6.05    |
| -400                        | 1.609   | 1.229  | 1.026  | 109.5 | 103.9 | 120.1                                            | 108.5                                                | 8.98    | 5.99    |
| -350                        | 1.611   | 1.226  | 1.024  | 110.1 | 104.4 | 121.5                                            | 109.3                                                | 8.52    | 5.92    |
| -300                        | 1.614   | 1.222  | 1.023  | 110.6 | 104.9 | 122.9                                            | 110.2                                                | 8.06    | 5.86    |
| -250                        | 1.617   | 1.219  | 1.022  | 111.1 | 105.4 | 124.3                                            | 111.1                                                | 7.61    | 5.79    |
| -200                        | 1.621   | 1.217  | 1.021  | 111.6 | 105.8 | 125.7                                            | 112.1                                                | 7.18    | 5.73    |
| -150                        | 1.626   | 1.214  | 1.020  | 112.1 | 106.3 | 127.2                                            | 113.0                                                | 6.74    | 5.66    |
| -100                        | 1.633   | 1.212  | 1.019  | 112.6 | 106.8 | 128.7                                            | 114.1                                                | 6.31    | 5.59    |
| -50                         | 1.641   | 1.210  | 1.018  | 113.1 | 107.4 | 130.3                                            | 115.3                                                | 5.87    | 5.51    |
| 0                           | 1.649   | 1.208  | 1.017  | 113.6 | 107.9 | 131.9                                            | 116.3                                                | 5.44    | 5.44    |
| 50                          | 1.660   | 1.207  | 1.016  | 114.1 | 108.5 | 133.6                                            | 117.8                                                | 5.44    | 5.35    |
| 100                         | 1.674   | 1.205  | 1.015  | 114.6 | 109.1 | 135.6                                            | 119.2                                                | 4.99    | 5.25    |
| 150                         | 1.692   | 1.204  | 1.015  | 115.2 | 109.8 | 137.7                                            | 120.9                                                | 4.52    | 5.14    |
| 200                         | 1.716   | 1.202  | 1.014  | 115.8 | 110.6 | 140.4                                            | 122.9                                                | 4.04    | 4.99    |
| 250                         | 1.751   | 1.201  | 1.013  | 116.5 | 111.6 | 143.8                                            | 125.5                                                | 3.51    | 4.80    |
| 300                         | 1.820   | 1.199  | 1.011  | 117.5 | 113.2 | 149.2                                            | 130.7                                                | 2.90    | 4.42    |
| 320                         | 1.902   | 1.197  | 1.009  | 118.3 | 114.9 | 154.7                                            | 136.8                                                | 1.80    | 3.97    |
| 321                         | 3.207   | 1.192  | 1.021  | 119.7 | 102.3 | 168.3                                            | 105.7                                                | 4.20    | 2.01    |

<sup>a</sup>The bond distance are in angstroms; angles, in degrees; dipole moment, in Debye.

**Table S2.** NBO charge  $q_1$  of  $\text{BH}_3\text{NH}_3$  in external electric fields and NBO charge  $q_2$  of  $\text{BH}_3\text{NH}_3$  after external electric fields. The Laplacian of the electron density ( $\nabla^2\rho(r)$ ) and electron density ( $\rho$ ) of the bond critical points (BCPs).

| $E_{ext} \times 10^{-4}$ au | $q_1(\text{NH}_3)$ | $q_1(\text{BH}_3)$ | $q_2(\text{NH}_3)$ | $q_2(\text{BH}_3)$ | $\nabla^2\rho(\text{B-N})$ | $\nabla^2\rho(\text{B-H})$ | $\nabla^2\rho(\text{N-H})$ | $\rho(\text{B-N})$ | $\rho(\text{B-H})$ | $\rho(\text{N-H})$ |
|-----------------------------|--------------------|--------------------|--------------------|--------------------|----------------------------|----------------------------|----------------------------|--------------------|--------------------|--------------------|
| -767                        | 0.706              | -0.706             | 0.318              | -0.318             | 0.124                      | -0.053                     | -1.809                     | 0.134              | 0.140              | 0.310              |
| -750                        | 0.618              | -0.618             | 0.322              | -0.322             | 0.152                      | -0.050                     | -1.811                     | 0.138              | 0.140              | 0.312              |
| -700                        | 0.529              | -0.529             | 0.325              | -0.325             | 0.198                      | -0.050                     | -1.818                     | 0.141              | 0.142              | 0.316              |
| -650                        | 0.490              | -0.490             | 0.327              | -0.327             | 0.235                      | -0.053                     | -1.823                     | 0.141              | 0.145              | 0.319              |
| -600                        | 0.472              | -0.472             | 0.330              | -0.330             | 0.267                      | -0.056                     | -1.826                     | 0.139              | 0.147              | 0.323              |
| -550                        | 0.457              | -0.457             | 0.330              | -0.330             | 0.297                      | -0.060                     | -1.828                     | 0.137              | 0.150              | 0.325              |
| -519                        | 0.449              | -0.449             | 0.329              | -0.329             | 0.314                      | -0.063                     | -1.828                     | 0.136              | 0.151              | 0.327              |
| -500                        | 0.444              | -0.444             | 0.329              | -0.329             | 0.324                      | -0.065                     | -1.828                     | 0.135              | 0.152              | 0.328              |
| -450                        | 0.430              | -0.430             | 0.328              | -0.328             | 0.350                      | -0.070                     | -1.826                     | 0.133              | 0.154              | 0.330              |
| -400                        | 0.419              | -0.419             | 0.327              | -0.327             | 0.374                      | -0.075                     | -1.824                     | 0.130              | 0.156              | 0.332              |
| -350                        | 0.406              | -0.406             | 0.326              | -0.326             | 0.128                      | -0.081                     | -1.820                     | 0.396              | 0.158              | 0.334              |
| -300                        | 0.393              | -0.393             | 0.325              | -0.325             | 0.308                      | -0.087                     | -1.816                     | 0.125              | 0.160              | 0.336              |
| -250                        | 0.380              | -0.380             | 0.324              | -0.324             | 0.435                      | -0.093                     | -1.811                     | 0.122              | 0.161              | 0.337              |
| -200                        | 0.370              | -0.370             | 0.323              | -0.323             | 0.452                      | -0.099                     | -1.805                     | 0.119              | 0.163              | 0.339              |
| -150                        | 0.356              | -0.356             | 0.322              | -0.322             | 0.466                      | -0.106                     | -1.798                     | 0.115              | 0.165              | 0.340              |
| -100                        | 0.344              | -0.344             | 0.321              | -0.321             | 0.479                      | -0.113                     | -1.791                     | 0.112              | 0.166              | 0.341              |
| -50                         | 0.331              | -0.331             | 0.319              | -0.319             | 0.487                      | -0.121                     | -1.785                     | 0.108              | 0.168              | 0.342              |
| 0                           | 0.316              | -0.316             | 0.316              | -0.316             | 0.494                      | -0.128                     | -1.775                     | 0.103              | 0.169              | 0.342              |
| 50                          | 0.300              | -0.300             | 0.313              | -0.313             | 0.494                      | -0.137                     | -1.770                     | 0.099              | 0.170              | 0.343              |
| 100                         | 0.284              | -0.284             | 0.309              | -0.309             | 0.495                      | -0.146                     | -1.763                     | 0.094              | 0.172              | 0.343              |
| 150                         | 0.267              | -0.267             | 0.303              | -0.303             | 0.487                      | -0.155                     | -1.757                     | 0.088              | 0.173              | 0.344              |
| 200                         | 0.248              | -0.248             | 0.295              | -0.295             | 0.469                      | -0.167                     | -1.751                     | 0.081              | 0.174              | 0.344              |
| 250                         | 0.225              | -0.225             | 0.284              | -0.284             | 0.436                      | -0.180                     | -1.748                     | 0.073              | 0.176              | 0.344              |
| 300                         | 0.191              | -0.191             | 0.262              | -0.262             |                            | -0.200                     | -1.757                     |                    | 0.178              | 0.344              |
| 320                         | 0.161              | -0.161             | 0.237              | -0.237             |                            | -0.217                     | -1.775                     |                    | 0.180              | 0.344              |
| 321                         | 0.005              | -0.005             | 0.018              | -0.018             |                            | -0.288                     | -1.621                     |                    | 0.186              | 0.335              |

**Table S3.** The fragment contribution to HOMO-2 of  $\text{BH}_3\text{NH}_3$  molecule in a series of  $E_{\text{ext}} \times 10^{-4}$  au.

| $E_{\text{ext}} \times 10^{-4}$ au | -767  | -750  | -700  | -650  | -600  | -550  | -519  | -500  | -450  | -400  | -350  | -300  | -250  |
|------------------------------------|-------|-------|-------|-------|-------|-------|-------|-------|-------|-------|-------|-------|-------|
| $\text{BH}_3\%$ [HOMO-2]           | 41.27 | 42.28 | 44.05 | 45.69 | 47.34 | 49.07 | 50.18 | 50.88 | 52.72 | 54.58 | 56.42 | 58.2  | 59.91 |
| $\text{NH}_3\%$ [HOMO-2]           | 58.73 | 57.72 | 55.95 | 54.31 | 52.65 | 50.92 | 49.82 | 49.13 | 47.28 | 45.42 | 43.58 | 41.8  | 40.09 |
| $E_{\text{ext}} \times 10^{-4}$ au | -200  | -150  | -100  | -50   | 0     | 50    | 100   | 150   | 200   | 250   | 300   | 320   | 321   |
| $\text{BH}_3\%$ [HOMO-2]           | 61.5  | 62.97 | 64.3  | 65.33 | 66.37 | 67.09 | 67.52 | 67.61 | 67.11 | 65.66 | 60.97 | 53.57 | 3.03  |
| $\text{NH}_3\%$ [HOMO-2]           | 38.5  | 37.03 | 35.7  | 34.66 | 33.63 | 32.91 | 32.48 | 32.39 | 32.89 | 34.34 | 39.03 | 46.43 | 96.97 |

**Table S4.** The optimized structural parameters of BH<sub>3</sub>NH<sub>3</sub> dimers in different external electric fields<sup>a</sup>.

| $E_{ext} \times 10^{-4}$ au | r(B-N) | H <sub>1</sub> -B-H <sub>2</sub> -H <sub>3</sub> | H <sub>1</sub> '-N-H <sub>2</sub> '-H <sub>3</sub> ' |
|-----------------------------|--------|--------------------------------------------------|------------------------------------------------------|
| -200                        | 1.606  | 112.4                                            | 123.1                                                |
| -150                        | 1.610  | 124.2                                            | 124.3                                                |
| -100                        | 1.614  | 114.2                                            | 114.2                                                |
| -50                         | 1.620  | 115.1                                            | 115.1                                                |
| 0                           | 1.626  | 128.1                                            | 116.1                                                |
| 50                          | 1.634  | 129.5                                            | 117.2                                                |
| 100                         | 1.643  | 130.9                                            | 118.4                                                |
| 150                         | 1.654  | 132.5                                            | 119.5                                                |
| 200                         | 1.668  | 134.2                                            | 121.0                                                |

<sup>a</sup>The bond distance are in angstroms; angles, in degrees.

### Optimized Cartesian Coordinates

BH<sub>3</sub>NH<sub>3</sub> without external electric field

|   |             |             |             |
|---|-------------|-------------|-------------|
| B | 0.00000000  | 0.00000000  | -0.10573900 |
| N | 0.00000000  | 0.00000000  | 1.54374200  |
| H | 1.16752400  | 0.00000000  | -0.41674100 |
| H | -0.58376200 | -1.01110600 | -0.41674100 |
| H | -0.58376200 | 1.01110600  | -0.41674100 |
| H | -0.94926200 | 0.00000000  | 1.90888300  |
| H | 0.47463100  | 0.82208500  | 1.90888300  |
| H | 0.47463100  | -0.82208500 | 1.90888300  |

**Table S5.** Potential energy E of eclipsed forms of BH<sub>3</sub>NH<sub>3</sub> in different external electric fields.

|                             |          |          |          |          |          |
|-----------------------------|----------|----------|----------|----------|----------|
| $E_{ext} \times 10^{-4}$ au | -200     | -150     | -100     | -50      | 0        |
| E (au)                      | -82.6896 | -82.6754 | -82.6619 | -82.6490 | -82.6368 |
| $E_{ext} \times 10^{-4}$ au | 50       | 100      | 150      | 200      |          |
| E (au)                      | -82.6253 | -82.6145 | -82.6043 | -82.5949 |          |
